# Supplementary material for: High-tolerance crystalline hydrogels formed from self-assembling cyclic dipeptide
Source: publisher site journal article supplement (doi:10.3762/bjnano.10.184), 2019-09-18
Supplement: Additional file 1 [file 2190-4286-10-184-S1.pdf]

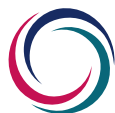

## Supporting Information

for

### High-tolerance crystalline hydrogels formed from self-assembling cyclic dipeptide

Yongcai You, Ruirui Xing, Qianli Zou, Feng Shi and Xuehai Yan

*Beilstein J. Nanotechnol.* **2019**, *10*, 1894–1901. doi:10.3762/bjnano.10.184

## Experimental section and additional figures

## **Experimental Section**

### ***Materials***

Peptide cyclo-(Trp-Tyr) (cyclo-WY) was purchased from Bachem Company. Sodium alginate (ALG), hyaluronic acid (HA), poly-L-Lysine (PLL), Nile red (NR) and thioflavin T (ThT) were obtained from Sigma Aldrich Chemical Company. Sodium hydroxide (NaOH), hydrochloric acid (HCl), dimethyl sulfoxide (DMSO) were products of Beijing Chemical Co. Ltd. All solutions were freshly prepared for immediate use. Water was prepared in a double-stage Milipore Milli-Q Plus purification system.

### ***Methods***

#### **Preparation of the hydrogel**

The cyclo-WY hydrogel was prepared through a solvent replacement method. Typically, a DMSO solution (20  $\mu$ L) of cyclo-WY (2 mg) was prepared by heating in a water bath at 55 °C until completely dissolved. The DMSO solution of cyclo-WY was mixed with 480  $\mu$ L pure water and the obtained mixture was aged for 48 h at room temperature. Hydrogel was formed. The hydrogel was repeatedly washed by water and was freeze-dried for further characterizations.

#### **Characterization**

Fourier transform infrared spectroscopy (FTIR) spectra were obtained by a spectrometer (TENSOR-27, Bruker). Scanning electron microscopy (SEM) images were taken with an S-4800 scanning electron microscope, as follows: A thin layer of

hydrogel was dropped on a 5 mm × 5 mm silicon slice and dried in a vacuum system. Samples were coated with Au on a BAL-TEC (SCD 050 sputter) before imaging. Transmission electron microscopy (TEM) images were obtained using a JEM-1011 microscope (JEOL). Confocal laser scanning microscope (CLSM) images were obtained by an Olympus FV500 microscope. X-ray diffraction (XRD) patterns were performed on an Empyrean instrument (Panalytical, Netherlands). A polarizing Optical Microscope (POM, Olympus BX53) was utilized to study the polarization properties of the hydrogels. Thermogravimetric analysis (TGA) results were recorded on a thermal analysis instrument (Q600 Simultaneous DSC-TGA). The samples were heated from 25 °C to 400 °C at a constant rate of 10 °C min<sup>-1</sup> under N<sub>2</sub> atmosphere of 50 mL min<sup>-1</sup>. The rheological properties of hydrogels were tested using a rotational rheometer (Anton paar MCR302) at 25 °C , as follows: the hydrogel samples were placed on the middle of a 15 mm diameter parallel plate. Preventing the evaporation of water, a lid was used. Dynamic oscillatory strain amplitude sweep measurements were studied at a frequency of 10 rad s<sup>-1</sup>. Dynamic oscillatory frequency sweep measurements were conducted at 1% strain amplitude. An alternation of larger strain of 500% and small strain of 0.1% was applied on hydrogels for several cycles, to study the recovery behavior of hydrogels.

### **Stability of hydrogels**

Charged biopolymers, including positive charged PLL and negative charged HA and ALG, were used. The composite hydrogels were typically prepared as follows: 20 μL DMSO solution of cyclo-WY (2 mg) was mixed with 480 μL water solution of

biopolymer (PLL or HA or ALG, 0.1 mg). The morphology, rheological properties and XRD patterns were conducted utilizing SEM, rotational rheometer and XRD instruments. Hydrogels of pH 1 and pH 14 were prepared as follows: 20  $\mu$ L DMSO solution of cyclo-WY (2 mg) was heated in a water bath at 55 °C until completely dissolved; the DMSO solution of cyclo-WY was mixed with 480  $\mu$ L pure water and then pH of the final samples were adjusted to 1 or 14. The hydrogels were aged for 48 h before further characterization.

### **Electrochemical measurements**

The electrochemical behavior of hydrogels were studied on a glassy carbon (GC) electrode. The electrode was preliminary polished with 0.05  $\mu$ m alumina slurries and coated with a layer of the hydrogel (10  $\mu$ L). The electrode was subsequently air-dried and tested on a CHI 660E electrochemical work station.

## Additional Figures

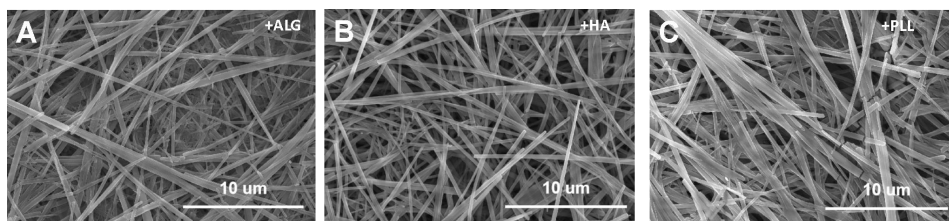

**Figure S1** SEM photos of cyclo-WY/biopolymer hydrogels.

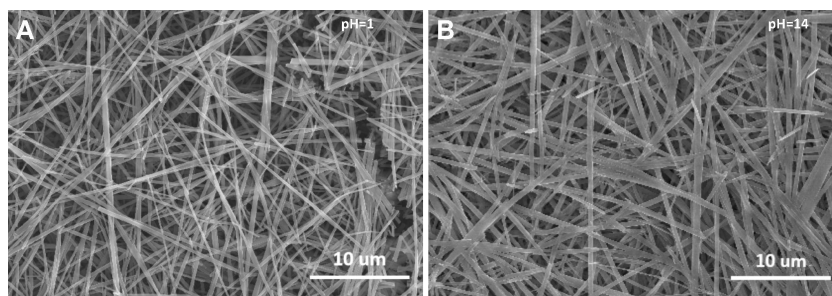

**Figure S2** SEM images of cyclo-WY hydrogel at different pH values.

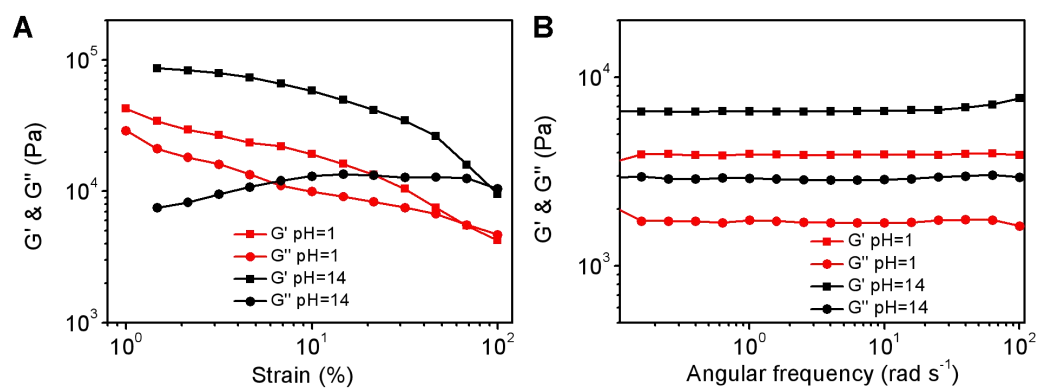

**Figure S3** Strain-dependent (A) and (B) frequency-dependent oscillatory shear rheology of the hydrogels at pH 1 and pH 14.
